# Supplementary material for: Feeding and food availability modulate brain-derived neurotrophic factor, an orexigen with metabolic roles in zebrafish
Source: PubMed Central journal article supplement (PMC7329848; doi:10.1038/s41598-020-67535-z), 2020-07-01
Supplement: 41598_2020_67535_MOESM1_ESM.pdf [file 41598_2020_67535_MOESM1_ESM.pdf]

# **Feeding and Food Availability Modulate Brain-Derived Neurotrophic Factor, an Orexigen with Metabolic Roles in Zebrafish**

Ayelén Melisa Blanco<sup>1,2</sup>, Juan Ignacio Bertucci<sup>1,3</sup>, Azadeh Hatem<sup>1,3</sup>, Suraj Unniappan<sup>1\*</sup>

<sup>1</sup> Laboratory of Integrative Neuroendocrinology, Department of Veterinary Biomedical Sciences, Western College of Veterinary Medicine, University of Saskatchewan, Saskatoon, Saskatchewan, Canada.

<sup>2</sup> Laboratorio de Fisiología Animal, Departamento de Biología Funcional e Ciencias da Saúde, Facultade de Biología and Centro de Investigación Mariña, Universidade de Vigo, Vigo, Pontevedra, Spain.

<sup>3</sup> Toxicology Centre, University of Saskatchewan, Saskatoon, Saskatchewan, Canada.

**Supplementary Figure 1.** Full-length images of immunoblots included in Figures 5a and b. Bands shown in Figures 5a and b are boxed. For each protein, two separate blots containing two samples per treatment were performed. Figure here shows one of those two blots. **(a)** Glut2. **(b)** Sgl1. Molecular markers are included. See corresponding figure legend for details.

**a**

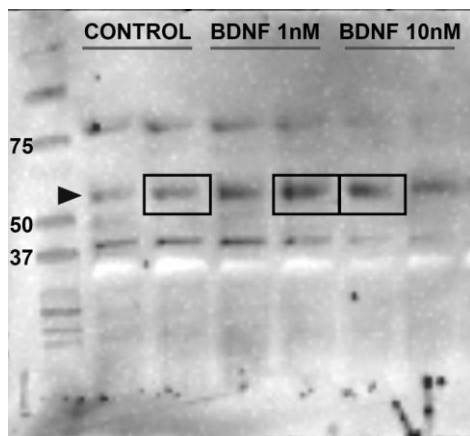

**b**

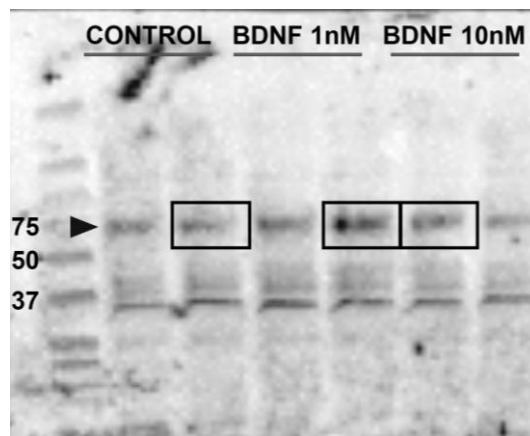

**Supplementary Table S1.** Primers used for quantifying gene expression by RT-qPCR in this study.

| <b>Gene</b>    | <b>GenBank accession number</b> | <b>Primer sequence (5' to 3')</b>                   | <b>Product size (bp)</b> |
|----------------|---------------------------------|-----------------------------------------------------|--------------------------|
| <i>β-actin</i> | AF057040.1                      | F: TTCAAACGAACGACCAACCT<br>R: TTCCGCATCCTGAGTCAATG  | 93                       |
| <i>acaca</i>   | NM_001271308.1                  | F: AATCAGGTGGTACGGATGGC<br>R: GGATGTTCCCTCTGTTGGGG  | 160                      |
| <i>acadm</i>   | NM_213010.2                     | F: AAGGTTTTGAGGGCAGGTGT<br>R: ACTCTTTCTGCTGCTCGGTT  | 139                      |
| <i>acat1</i>   | NM_001003746.1                  | F: ATCCCGCAGAGAGGAAAACC<br>R: CGAGTGGTGTGACGTTGAGT  | 211                      |
| <i>acly</i>    | BC076484.1                      | F: CCCACACCGCTAACTTCCTT<br>R: TCCTGGCGCGAACAACATA   | 247                      |
| <i>agrp</i>    | NM_001328012.1                  | F: CTGGGACGTGAGCACTACAG<br>R: AAGGTGCTCCATTTTCAGGCA | 169                      |
| <i>bdnf</i>    | U42489.1                        | F: CGAGGAATAGACAAGCGGCA<br>R: ATCCGTATAAACC GCCAGCC | 110                      |
| <i>cart</i>    | GU057836.1                      | F: GAGAGACTTGGCTGAGGCAC<br>R: GAAAGTGTTGCAGGCGGTTT  | 181                      |
| <i>cck</i>     | XM_001346104.6                  | F: ACGCTGGACTCTGTGTAT<br>R: CTTCATCGTCCTCTGGTTTG    | 186                      |
| <i>cpt1a</i>   | NM_001044854.1                  | F: TCTACCTGAGAGGTCGTGGG<br>R: TAGCCGTTCCATTGAGCAG   | 215                      |
| <i>echs1</i>   | NM_001004529.2                  | F: CCCTTGCGATGGAGATGGTT<br>R: CGACTGCCCTCAGCTAAAGT  | 214                      |
| <i>fasn</i>    | XM_009306807.3                  | F: GGCGAGTGGTCAGTCAGTTA<br>R: TTGTTCTGACTCAGGAAGGCG | 134                      |
| <i>fbp1a</i>   | NM_199942.2                     | F: TGGCGAGTTCATTCTGGTGG<br>R: TCTGCCACCATTGAGCCTAC  | 183                      |

|                               |                |                                                      |     |
|-------------------------------|----------------|------------------------------------------------------|-----|
| <i>fbp1b</i>                  | NM_213132.1    | F: GAGTCCCAAGGGCAAGCTAA<br>R: TACAGGAACCCTCTGGTGGGA  | 142 |
| <i>g6pcb</i>                  | XM_002661194.6 | F: CATCTGGACACCACACCCTT<br>R: TGGGTGGTCTGAACGAGTCT   | 196 |
| <i>gck</i>                    | NM_001045385.2 | F: GACACAGGGGACAGAAAGCA<br>R: CCACCCCCACAGTGATCTTT   | 205 |
| <i>glut2</i>                  | DQ098687.1     | F: GGATACAGCTTGGGCGTCAT<br>R: CTCTGTGCCATTTCCCCCTT   | 117 |
| <i>glycogen phosphorylase</i> | AY576991.1     | F: TGTAAGTCCTCGCGCACA<br>R: ACATCCCCGAGTCCTGCTAT     | 156 |
| <i>grl</i>                    | AM055940.1     | F: ATGGTCCCGTGCTTCAGAAT<br>R: TGCACCCACTTTGCTACAGA   | 206 |
| <i>hmgcl</i>                  | NM_201215.1    | F: AGCCACGTCAATAGAAAGCAGT<br>R: CCTGGTCCTTTTGCCTCTGT | 157 |
| <i>hadh</i>                   | NM_001003515.1 | F: TGGAGGCTGTTCGGTTACAC<br>R: TTTGTTGAGCAGGGGACTGG   | 203 |
| <i>leptin a</i>               | NM_001128576.1 | F: GCTCTCCGCTCAACCTGTATT<br>R: TTTGCCCGTCAATGTGTTCC  | 136 |
| <i>leptin b</i>               | NM_001030186.3 | F: TTCCCCGTCACCTCCAATA<br>R: CCTTGCATGTGCCATTGTGTT   | 190 |
| <i>npy</i>                    | NM_131074.2    | F: GGCCACCAGATCTCATAAA<br>R: GCGCACATTGACGTATTT      | 146 |
| <i>nucb2 a</i>                | NM_201493.1    | F: AGGAGCGGCATGAAGAATTT<br>R: GATGGTTGACTTTGGGGTGA   | 156 |
| <i>nucb2 b</i>                | NM_201479.1    | F: TCTGTGGGCTTGTGTTGGATG<br>R: TTCTCTCTGAAATGCGGGTC  | 168 |
| <i>orexin</i>                 | NM_001077392.2 | F: AGAAACGACTCTTCCGTCGC<br>R: CGGCTTGATTCCGTGAGTTG   | 148 |
| <i>p75ntr a</i>               | XM_003198085.5 | F: GAGTTGGCAAGCTCTTGTGC<br>R: AAGTGAAGCTCAGCCATCGG   | 233 |

|                 |                      |                                                     |     |
|-----------------|----------------------|-----------------------------------------------------|-----|
| <i>p75ntr b</i> | NM_001198660.1       | F: TACAACCAGGGGAGAGTGCT<br>R: CATCATTGGCATCCGTGCAG  | 203 |
| <i>pck1</i>     | NM_214751.1          | F: AGCTCTTCAGGGTCTCGCA<br>R: TAACGTGTGTGTTGCGTGTCTT | 185 |
| <i>pck2</i>     | NM_213192.1          | F: TCCTTCGGCAGTGGTTATGG<br>R: GCTGCTGCAATGTACCGTTT  | 161 |
| <i>pfkla</i>    | XM_693543.8          | F: AGGTATGAACGCAGCCATCC<br>R: TGCCAATCACTGTTCCCTCCC | 173 |
| <i>pfklb</i>    | NM_001328389.1       | F: TTTGAGCACAGGATGCCGAA<br>R: TCGATGCTAAGGGTTCGACG  | 140 |
| <i>pklr</i>     | BC152219.1           | F: CCAGTTTAAACACGCGCGGC<br>R: GGAAGTGTCTTTGGCTGT    | 113 |
| <i>pomc</i>     | NM_181438.3          | F: CACTGCTCACACTCTTCA<br>R: GCCCACCTTCGTTTCTAT      | 167 |
| <i>ppara a</i>  | NM_001161333.1       | F: TAATCCACTCTCTGCGGCTC<br>R: CATGTTACTGCCGGTCTCCT  | 247 |
| <i>ppargc1a</i> | ENSDART00000097710.6 | F: AAAGCCGGTGAAGCCAAGAG<br>R: GGTCACTGCAACACAGAGGA  | 238 |
| <i>splt1</i>    | NM_200681.1          | F: TGTCCGTCATGTTGGCTTCA<br>R: TCTGAGCCGTCTGAACGATG  | 198 |
| <i>trkb2</i>    | NM_001197161.2       | F: TCACCTATGGCAAGCAACCC<br>R: CTTTGGGGCAAGTACGAGGT  | 102 |

F, Forward primer; R, Reverse primer

*acadm*, medium-chain acyl-CoA dehydrogenase; *acat1*, acetyl-CoA acetyltransferase 1; *acc*, acetyl-CoA carboxylase; *acly*, ATP citrate lyase; *agrp*, agouti-related protein; *bdnf*, brain-derived neurotrophic factor; *cart*, cocaine- and amphetamine-regulated transcript; *cck*, cholecystokinin; *cpt1a*, carnitine palmitoyltransferase 1a; *ech*, enoyl-CoA hydratase; *fas*, fatty acid synthase; *fbpase 1a*, fructose biphosphatase 1a; *g6pase b*, glucose 6-phosphatase b; *gk*, glucokinase; *glut2*, glucose transporter 2; *grl*, ghrelin; *hmgcl*, 3-hydroxy-3-methylglutaryl-CoA lyase; *hoad*, 3-hydroxyacyl CoA dehydrogenase; *npy*, neuropeptide Y; *nucb2*, nucleobindin 2; *p75ntr*, neurotrophin receptor p75; *pepck2*, phosphoenolpyruvate carboxykinase 2; *pk*, pyruvate kinase; *pomc*, proopiomelanocortin; *ppara*, peroxisome proliferator-activated receptor alpha;

*ppargc1α*, peroxisome proliferator-activated receptor gamma coactivator 1-alpha;  
*splt1*, sodium-glucose cotransporter 1; *trkb2*, tropomyosin receptor kinase B2.
